# Supplementary material
Source: PubMed Central journal article supplement (PMC10693687)
Supplement: NIHMS1901725-supplement-Supporting_Information.pdf [file NIHMS1901725-supplement-Supporting_Information.pdf]

## SUPPORTING INFORMATION

**TITLE.** Altered protein dynamics and increased aggregation in human  $\gamma$ S-crystallin due to cataract-associated deamidations

**AUTHORS.** Heather M. Forsythe<sup>1</sup>, Calvin J. Vetter<sup>2</sup>, Kayla Ann Jara<sup>1</sup>, Patrick N. Reardon<sup>3</sup>, Larry L. David<sup>4</sup>, Elisar J. Barbar<sup>1\*</sup> and Kirsten J. Lampi<sup>2\*</sup>

**PAGES- 10**

### SUPPORTING FIGURES and TABLE

**Figure S1.** Chromatograms of doubly charged  $\gamma$ S peptide 7-18 (ITFYEDKNFQGR).

**Figure S2.** Light scattering of  $\gamma$ S crystallins.

**Figure S3.** Summary of NMR methods.

**Figure S4.** TROSY overlay of WT (black) with N14D (cyan) on the left, and N76D (red) on the right.

**Figure S5.** CLEANEX (top) and day 6 core residue (bottom) intensities of WT (black), N14D (cyan), and N76D (red).

**Figure S6.** NOE values for WT (grey), N14D (cyan), and N76D (red).

**Table S1.** Measured H/D exchange rates for WT (grey), N14D (cyan), and N76D (red).

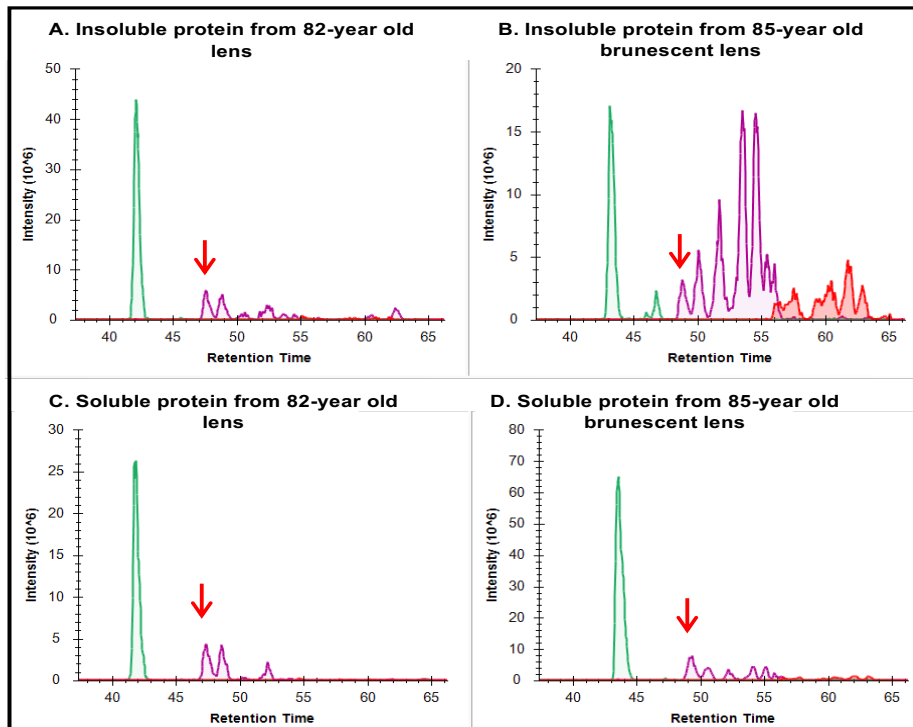

**Figure S1. Chromatograms of doubly charged  $\gamma$ S peptide 7-18 (ITFYEDKNFQGR) isolated from 82- and 85-year old human lens nucleus.** Chromatograms show the extent of deamidation in the water-soluble and water insoluble fractions. Non-deamidated (green), singly deamidated (purple), and doubly deamidated peptide (red). The arrow shows the peptide containing deamidation at only Q16, while all other singly deamidated forms contained deamidation at only N14. Note that the multiple peaks are due to isomerization and racemization occurring when N14 deamidates, as well as isomerization and racemization occurring at D12. The area under the singly deamidated purple peaks, not including the peak from the peptide with a deamidated Q16 (arrow), as well as the area under all doubly deamidated peaks were used to calculate the values for % deamidation at N14 shown in Fig. 2.

**A. WT  $\gamma$ S**

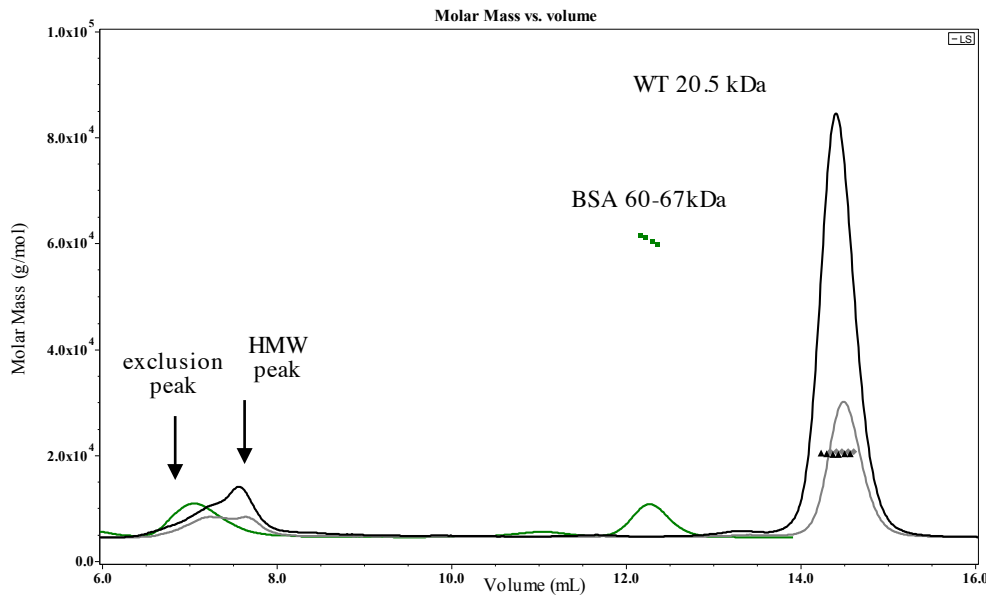

**B. N14D  $\gamma$ S**

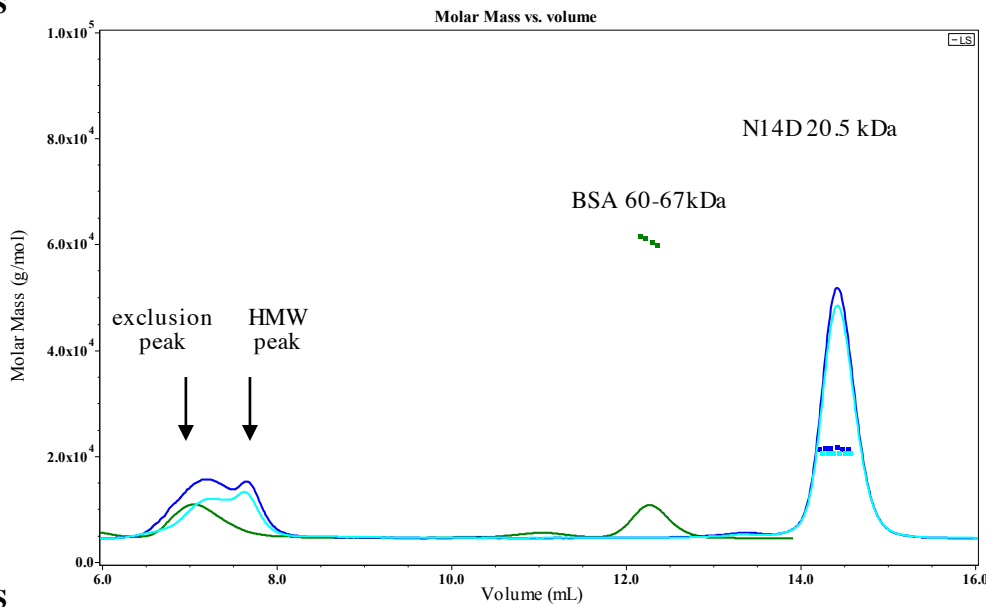

**C. N76D  $\gamma$ S**

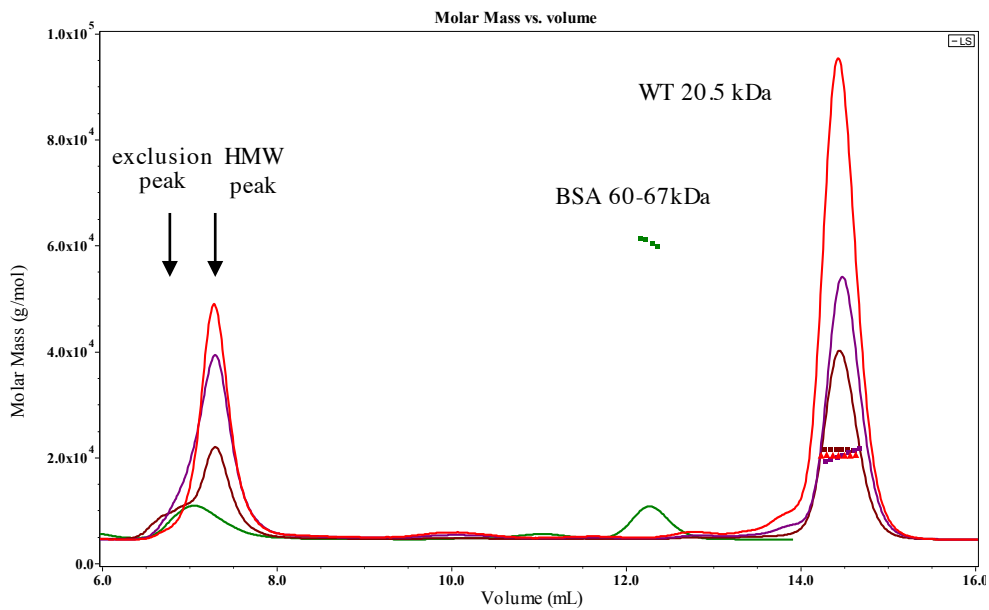

**Figure S2. Relative Rayleigh light scattering (LS tracings) and molar masses (markers) of WT and deamidated human  $\gamma$ S crystallins.** (A) WT tracings (grey and black), (B) N14D tracings (cyan and blue), and (C) N76D tracings (purple, brown, and red) during size-exclusion chromatography in-line with multiangle laser scattering. The  $\gamma$ S monomer eluted between 14 and 15 mL for all three samples and was between 20-21 kDa. Different concentrations were injected with approximately 100-400 ug eluting in the monomer peaks. A 50 ug sample of bovine serum albumin (BSA) was used to determine the elution volume of the exclusion peak at 7 mls (black arrow and the green LS tracing). An additional light scattering peak just after this exclusion peak between 7-8 mls (blue arrow) was detected and had greater intensity in N14D and N76D than in WT at similar protein concentrations injected. All peak intensities are relative to the highest monomer peak intensity found in panel C.

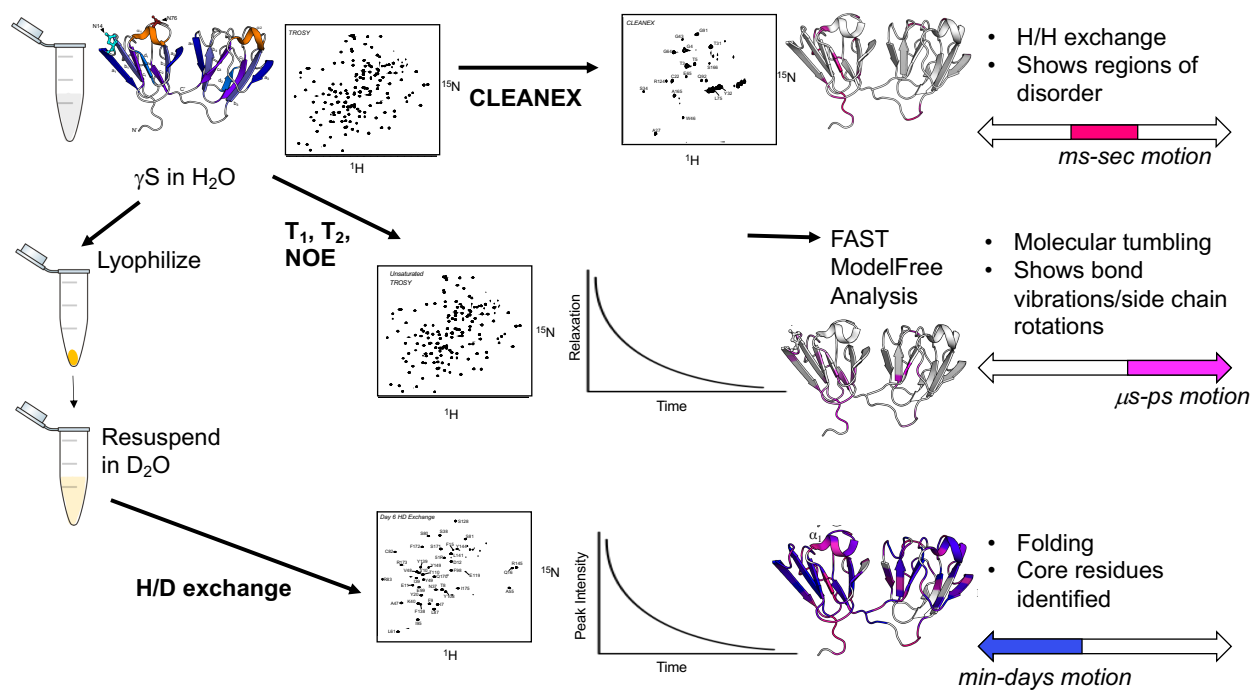

**Figure S3. Summary of NMR methods.** Experiments CLEANEX-HSQC,  $T_1$ ,  $T_2$ , and  $^1\text{H}$ - $^{15}\text{N}$  Heteronuclear NOE were collected on WT, N14D, and N76D  $\gamma$ S crystallin to obtain dynamics information for ps-to-sec motions. Samples were then lyophilized and resuspended in  $\text{D}_2\text{O}$  to collect information about motions occurring on the timescale of min-to-days.

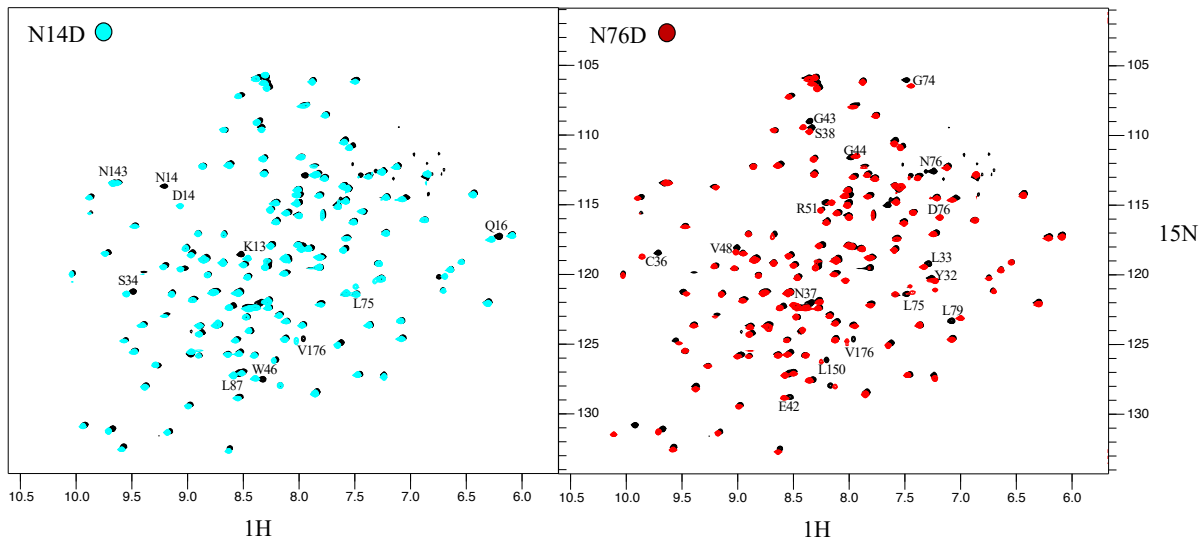

**Figure S4. TROSY overlay of WT (black) with N14D (cyan) on the left and N76D (red) on the right. Spectra were referenced to DSS.**

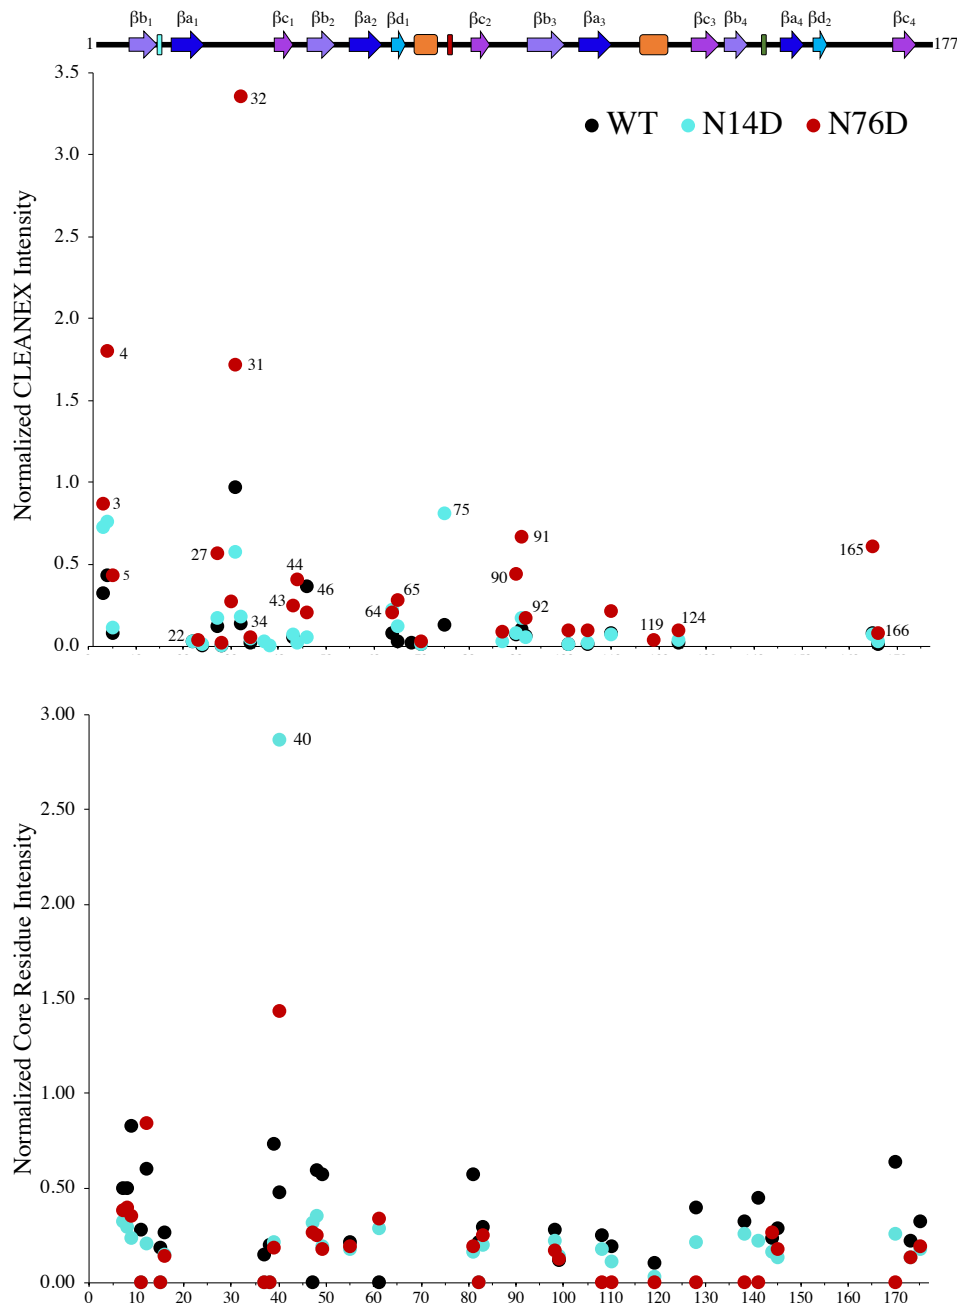

**Figure S5. CLEANEX (top) and day 6 core residue (bottom) intensities of WT (black), N14D (cyan), and N76D (red).** Values were normalized to the TROSY peak intensities, and presented as a ratio of CLEANEX or core residue intensities to TROSY intensities for the same residues in the same samples. Regions of high intensity that differ from WT were plotted in hotpink (CLEANEX) or blue (core residues) onto the structure in Figure 6A.

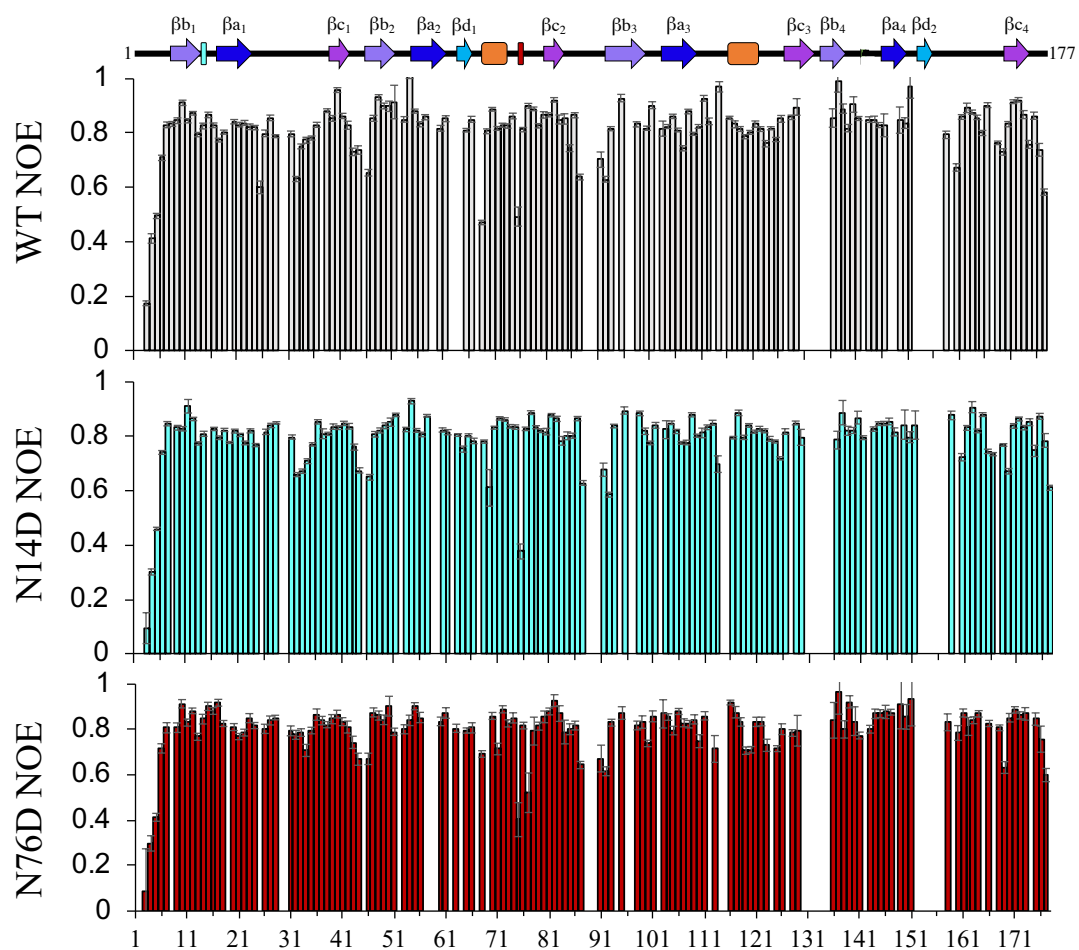

**Figure S6.** NOE values for WT (black), N14D (cyan), and N76D (red). Values below 0.5 indicated regions of flexibility while those close 1.0 corresponded to fully ordered regions.



| Residue | WT $k_{ex}$<br>( $sec^{-1} * 10^6$ ) | N14D $k_{ex}$<br>( $sec^{-1} * 10^6$ ) | N76D $k_{ex}$<br>( $sec^{-1} * 10^6$ ) |      |               |               |              |
|---------|--------------------------------------|----------------------------------------|----------------------------------------|------|---------------|---------------|--------------|
| S2      | 500 ± 300                            | f                                      | 900 ± 400                              | V85  | 3 ± 8         | 7 ± 50        | 2 ± 0.013    |
| K6      | 400 ± 400                            | 600 ± 700                              | 900 ± 800                              | H86  | 0.05 ± 0.001  | 0.016 ± 0.001 | 0.09 ± 0.001 |
| I7      | s                                    | 0.17 ± 0.006                           | 400 ± 1100                             | G90  | 30 ± 12       | 40 ± 14       | 2 ± 0.003    |
| T8      | s                                    | 0.3 ± 0.003                            | 1500 ± 900                             | G91  | x             | 300 ± 140     | 80 ± 6       |
| F9      | s                                    | s                                      | 0.13 ± 0.001                           | Y93  | s             | i             | 0.5 ± 0.001  |
| Y10     | 0.2 ± 0.001                          | s                                      | 19 ± 3                                 | E99  | 90 ± 160      | 0.05 ± 0.001  | s            |
| E11     | 0.3 ± 0.003                          | 17 ± 2                                 | 5 ± 0.05                               | K100 | s             | 30 ± 11       | 40 ± 7       |
| D12     | 0.2 ± 0.001                          | 0.5 ± 0.0016                           | 3 ± 0.001                              | F103 | i             | 130 ± 30      | f            |
| K13     | s                                    | s                                      | 0.5 ± 0.001                            | S104 | s             | 130 ± 13      | 200 ± 60     |
| N14     | i                                    | s                                      | 200 ± 50                               | Q106 | s             | 0.10 ± 0.001  | f            |
| F15     | 0.4 ± 0.001                          | 20 ± 0.4                               | 0.6 ± 0.001                            | M107 | 0.12 ± 0.007  | s             | f            |
| Q16     | 0.07 ± 0.001                         | s                                      | 0.3 ± 0.002                            | Y108 | 0.17 ± 0.001  | s             | 20 ± 11      |
| R18     | s                                    | 1300 ± 900                             | f                                      | T110 | s             | 12 ± 20       | s            |
| R19     | 500 ± 200                            | 150 ± 500                              | 900 ± 300                              | T111 | s             | i             | 6 ± 0.19     |
| Y20     | s                                    | s                                      | 6 ± 0.005                              | E112 | 500 ± 90      | 50 ± 11       | s            |
| C22     | x                                    | x                                      | 50 ± 40                                | D113 | f             | f             | 300 ± 190    |
| D23     | f                                    | i                                      | 0.12 ± 0.001                           | C114 | s             | s             | 0.2 ± 0.001  |
| D25     | 700 ± 600                            | 400 ± 200                              | 5 ± 0.001                              | S116 | 0.07 ± 0.0014 | s             | 16 ± 0.001   |
| C26     | 80 ± 120                             | 60 ± 70                                | i                                      | I117 | 1.5 ± 0.007   | 3 ± 0.006     | f            |
| D28     | x                                    | x                                      | 400 ± 0.001                            | M118 | 0.04 ± 0.001  | s             | 1.1 ± 0.001  |
| H30     | 800 ± 600                            | 10 ± 7                                 | x                                      | E119 | s             | 0.2 ± 0.001   | f            |
| L33     | 160 ± 17                             | 120 ± 4                                | 600 ± 500                              | Q120 | s             | 0.2 ± 0.001   | 0.08 ± 0.001 |
| R35     | 0.4 ± 0.001                          | 800 ± 190                              | 700 ± 700                              | H122 | s             | 0.6 ± 0.004   | f            |
| C36     | 1.4 ± 0.003                          | 800 ± 200                              | 1004 ± 1700                            | M123 | 600 ± 400     | 900 ± 900     | f            |
| N37     | 60 ± 7                               | x                                      | 130 ± 65                               | R124 | 0.2 ± 0.001   | 12 ± 40       | 16 ± 4       |
| S38     | 0.2 ± 0.0014                         | x                                      | 0.003 ± 0.001                          | E125 | s             | s             | 0.03 ± 0.001 |
| K40     | 0.13 ± 0.001                         | s                                      | 0.12 ± 0.04                            | I126 | i             | 40 ± 17       | 40 ± 100     |
| V41     | 7 ± 0.8                              | 19 ± 40                                | 20 ± 1.3                               | S128 | 0.06 ± 0.001  | s             | 0.06 ± 0.001 |
| E42     | s                                    | s                                      | 0.19 ± 0.001                           | C129 | 20 ± 0.8      | 14 ± 1.0      | i            |
| G43     | 120 ± 20                             | x                                      | x                                      | W136 | 4 ± 0.06      | s             | i            |
| T45     | s                                    | 40 ± 2                                 | 1030 ± 0.001                           | I137 | 0.02 ± 0.001  | 0.4 ± 0.001   | 0.05 ± 0.001 |
| A47     | s                                    | s                                      | 0.06 ± 0.001                           | Y139 | s             | s             | 0.5 ± 0.006  |
| V48     | 0.08 ± 0.001                         | s                                      | 0.03 ± 0.001                           | E140 | 0.2 ± 0.001   | 6 ± 0.14      | 1.2 ± 0.007  |
| Y49     | s                                    | 5 ± 0.3                                | 2 ± 0.05                               | L141 | s             | 0.8 ± 0.10    | 110 ± 0.001  |
| E50     | s                                    | s                                      | 1 ± 0.008                              | N143 | 40 ± 0.7      | s             | 30 ± 19      |
| R51     | s                                    | 0.16 ± 0.001                           | 2 ± 0.008                              | Y144 | s             | s             | 0.3 ± 0.001  |
| N53     | i                                    | 300 ± 40                               | 600 ± 500                              | R145 | s             | 0.3 ± 0.001   | 0.3 ± 0.02   |
| F54     | 0.2 ± 0.001                          | 1.6 ± 0.3                              | 0.7 ± 0.005                            | G146 | 0.2 ± 0.001   | 1.3 ± 0.04    | 5 ± 0.2      |
| A55     | 0.1 ± 0.001                          | s                                      | 0.5 ± 0.011                            | R147 | 500 ± 400     | 200 ± 140     | i            |
| Y57     | f                                    | 600 ± 180                              | 2 ± 0.03                               | Y149 | 0.05 ± 0.001  | s             | 0.12 ± 0.001 |
| I60     | s                                    | 60 ± 7                                 | 100 ± 40                               | L150 | i             | 200 ± 40      | 300 ± 400    |
| L61     | s                                    | s                                      | 0.03 ± 0.001                           | L151 | 0.013 ± 0.001 | s             | 0.11 ± 0.001 |
| Y66     | 40 ± 40                              | s                                      | s                                      | K158 | 30 ± 11       | s             | 130 ± 50     |
| E68     | x                                    | 40 ± 110                               | 100 ± 120                              | I160 | 1.2 ± 0.007   | 3 ± 0.008     | i            |
| Y69     | 200 ± 70                             | f                                      | 800 ± 300                              | D161 | 110 ± 90      | 80 ± 7        | 80 ± 70      |
| R71     | f                                    | 900 ± 1600                             | f                                      | W162 | i             | 19 ± 5        | 20 ± 2       |
| W72     | 3 ± 0.06                             | 170 ± 13                               | 7 ± 0                                  | G163 | s             | 300 ± 40      | 300 ± 70     |
| M73     | 0.4 ± 0.001                          | 90 ± 1400                              | 800 ± 700                              | A164 | s             | s             | 1.7 ± 0.001  |
| G74     | s                                    | 700 ± 200                              | 2 ± 0.018                              | S166 | f             | 0.4 ± 0.06    | 2 ± 0.06     |
| N76     | 17 ± 0.4                             | 1300 ± 1100                            | 600 ± 300                              | V169 | 4 ± 0.02      | 1200 ± 800    | 0.14 ± 0.001 |
| D77     | s                                    | i                                      | 1.3 ± 0.04                             | Q170 | 4 ± 0.19      | s             | 2 ± 0.015    |
| R78     | s                                    | 150 ± 6                                | i                                      | S171 | 0.06 ± 0.001  | s             | 4 ± 0.4      |
| L79     | 0.8 ± 0.008                          | 110 ± 11                               | s                                      | F172 | 17 ± 0.14     | 1 ± 0.001     | s            |
| S80     | 400 ± 400                            | s                                      | 0.5 ± 0.07                             | R173 | s             | s             | 9 ± 0.5      |
| S81     | 0.2 ± 0.002                          | s                                      | s                                      | R174 | 700 ± 300     | 50 ± 60       | s            |
| C82     | 0.2 ± 0.001                          | s                                      | 80 ± 200                               | I175 | 4 ± 1.7       | 60 ± 60       | 1.4 ± 0.8    |
| R83     | 0.02 ± 0.001                         | s                                      | 0.4 ± 0.012                            | V176 | 0.4 ± 0.001   | i             | f            |
| A84     | 140 ± 60                             | 90 ± 8                                 | 5 ± 0.06                               | E177 | s             | 0.11 ± 0.001  | s            |

**Table S1. Measured H/D exchange rates for WT (grey), N14D (cyan), and N76D (red).** For residues in which H/D exchange rates could not be determined, 's' was used to denote slow exchanging protons which did not experience appreciable decay after 6 days, 'i' for those that exchanged on an intermediate timescale between 2-6 days, 'f' for fast exchanging residues which exchanged after 1 day, and 'x' for those residues that appear in CLEANEX spectra and are the most rapidly exchanging.
